# Supplementary material for: Helical Antifreeze Proteins Have Independently Evolved in Fishes on Four Occasions
Source: PubMed Central journal article supplement (PMC3855684; doi:10.1371/journal.pone.0081285), 2013-12-06
Supplement: pone.0081285.s001.pdf [file pone.0081285.s001.pdf]

G7-2 1 -----  
 Liv1 1 -----  
 Liv5 1 -----  
 G1-4 1 -----  
 G7-4 1 -----  
 LHS 1 ggcacatcttcttctaacaccctggaagagacagacacctcgagtttatcatcatcctttattg  
 Lar4 1 -----  
 Liv4 1 -----  
 G4-1 1 -----  
 Skin 1 -----

G7-2 1 -----  
 Liv1 1 ----- tttccaaacgcaccga  
 Liv5 1 ----- tttccaaacgcaccga  
 G1-4 1 -----  
 G7-4 1 -----  
 LHS 61 agagaaacagttgtgactcatcaggaagttggtgatctttctcttttcggaaacgcaccga  
 Lar4 1 ----- tttccaaacgcaccga  
 Liv4 1 ----- tttccaaacgcaccga  
 G4-1 1 -----  
 Skin 1 -----gtgactcatcaggaagttggtgatctttctctgtttccaaacgcaccga  
 5'1 GGAAGTTGTTGATCTTTCTCT 5'2 CACCGA

G7-2 1 ----- ACCAGCAAGAGCAGCGGCAAAGACGGCAGCAGACG  
 Liv1 17 gctaaacaaaagtgagaATGGACGCACCAGCAAGAGCAGCGGCAAAGACGGCGGCGGACG  
 Liv5 17 gataaacaaaagtgagaATGGATGCACCAGCAAGAGCAGCGGCAAAGACGGCAGCAGACG  
 G1-4 1 ----- ACCAGCAAGAGCAGCGGCAAGACGGCAGCAGACG  
 G7-4 1 ----- ACCAGCAAGAGCAGCGGCAAAGACGGCAGCAGACG  
 LHS 121 gctaaacaaaagtgagaATGGACGCACCAGCAAGAGCAGCGGCAAAGACGGCAGCGGACG  
 Lar4 17 gctaaacaaaagtgagaATGGACGCACCAGCAGAGAGCAGCGGCAAGACGGCGGCGGCGG  
 Liv4 17 gataaacaaaagtgagaATGGACGCACCAGCAAGAGCAGCGGCAAGACGGCGGCGGCGG  
 G4-1 1 ----- AGCGCAGAAAGCGGCAAGGCTTGCGGCGGCGG  
 Skin 49 gctaaacaaaagtgagaATGGCGGCGGCGGCAAGGCGGCGGAGGCGGCGGCAATGGCGG  
 GCTAAACAAAAGTG  
 Deg1 ACAAAGTGAGAATGGAYGG  
 Deg2 GAGAATGGAYGGNGARACNCC

G7-2 36 CGTTGGCTGCGGCGAAGAAGACGGCGGCGGACGCTGCGGCTGCGGCG  
 Liv1 77 CGAAGGCTGCGGCGGCAAGACGGCGGCGGACGCTGCTAAGGCGGCGGCAAG  
 Liv5 77 CGTTGGCTGCGGCGAACAAGACGAAAGGCGGACGCTGCTGCGGCGGCGGCAAGACG  
 G1-4 36 CATTGGCTGCGGCGAACAAGACGGCGGCGGACGCTGCTGCGGCGGCGGCAAGACG  
 G7-4 36 CGTTGGCTGCGGCGAACAAGACGGCGGCGGACGCTGCTGCGGCGGCGGCAAGACG  
 LHS 181 CGAAGGCTGCGGCGGCAAGACGGCAGCGGACGCGTTGGCTGCGGCGAACAAGACGGCGG  
 Lar4 77 CGAAGGCTGCGGCTGAGAAGACGGCGGCGGACGCTTTGGCGGCGGCGGAGGCTACGAAGG  
 Liv4 77 CGAAGGCTGCGGCGAGAGAAGACGGCAGCGGACGCTTTGGCGGCGGCGGAGGCGACTGCGG  
 G4-1 33 CGGCGGCTTTGGCAGCGAAGACGGCGGCGGACGCTGCGGCGAAGGCGGCGGCGATTGCGG  
 Skin 109 CGGCAATGCGGCGGAGGCGGCGGCAACGAAGGCGGCTGATGCGGCTGCGTCTGCGGCGG

G7-2 84 ----- GCGGCTAAATAAttgg -----  
 Liv1 130 ----- TCTGCTAAATAAttgt -----  
 Liv5 133 ----- GCTGCTAAATAAttgg -----  
 G1-4 92 ----- GCTGCTAAATAAtttag -----  
 G7-4 92 ----- GCTGCTAAATAAtttag -----  
 LHS 241 CGGCGGCAAGGCGGCTGCTAAATAAttgg -----  
 Lar4 137 CAGCAGCTGCTAGAGCTTAG -----  
 Liv4 137 CAGCAGCTGCTAGAGCTTAG -----  
 G4-1 93 CAGCAGCTGCTAGTGTAG -----  
 Skin 169 CTGCGGCTATTGCGGCTATTGCGGAGGCGGCGGAGGCGGCGGAGGCGGCAACGAAGT



G7-2 189 -----tatgatttgtccctgcttaattcttaatccct-----  
 Liv1 224 -----tatggttggctctatgcttaattcttaatccctgatggtgctgacccaactc  
 Liv5 247 -----tatggttggctctatgcttaattcttaatccctgatggtgctgacccaactc  
 G1-4 178 -----tatgatttgtccctgcttaattcttaatccct-----  
 G7-4 178 -----tatgatttgtccctgcttaattcttaatccct-----  
 LHS 353 -----tatggttggctctatgcttaattcttaatccctgatggtgctgacccaactc  
 Lar4 218 -----  
 Liv4 233 ----aatttatggttggctctatgcttaattcttaatccctgatggtgactgacccaactc  
 G4-1 254 -----  
 Skin 491 ttgggaatttatggttggctctatgcttaattcttaatccctgatggtgctgacccaactc  
3'2 CTACAACGACTGGGTTGAG

G7-2 -----  
 Liv1 275 agtgtggtgcttgtttatggtgctgaatatcacaggttattaatacgtaaattcaagtat  
 Liv5 298 agtgtggtgcttg-----  
 G1-4 -----  
 G7-4 -----  
 LHS 404 agtgtggtgcttg-----  
 Lar4 218 -----  
 Liv4 288 agtgtggtgcttttttttttttg-----  
 G4-1 254 -----  
 Skin 551 agtgtggtgcttgtttatggtgctgaatatcacaggttattaatacgtaaattcaagtat

G7-2 -----  
 Liv1 335 ggaacacacattttattttgttggttgtgagaaaatgtattgtgcctatatactcgggtactc  
 Liv5 311 -----  
 G1-4 -----  
 G7-4 -----  
 LHS 417 -----  
 Lar4 218 -----  
 Liv4 310 -----  
 G4-1 254 -----  
 Skin 611 ggaacacacatggttattttgttggttgtg-----

G7-2 -----  
 Liv1 395 aaggacacaaccatcaggatgcaactcgacaactttaataatacttcttctcacacggtat  
 Liv5 311 -----  
 G1-4 -----  
 G7-4 -----  
 LHS 417 -----  
 Lar4 218 -----  
 Liv4 310 -----  
 G4-1 254 -----  
 Skin 639 -----

G7-2 -----  
 Liv1 455 atcacaacatcatatatcagtgcgccctcaactggccatagccggccactacaagaaaca  
 Liv5 311 -----  
 G1-4 -----  
 G7-4 -----  
 LHS 417 -----  
 Lar4 218 -----  
 Liv4 310 -----agaaaca  
 G4-1 254 -----  
 Skin 639 -----agaaaca

G7-2 -----  
Liv1 515 **catgcaatcaaacaaaaagcatcttgagacgctcctggttggaatcagtttaaatcaattt**  
Liv5 311 -----**tcaaacatatagcatcttgagacgctcctggttggaatcagtttaaatcaattt**  
G1-4 -----  
G7-4 -----  
LHS 417 -----**tcaaacaaaaagcatcttgagacgctcctggttggaatcagtttaaatcaattt**  
Lar4 218 -----**tcaaacaaaaagcatcttgagacgctcctggttggaatcag****cat****cat****caattt**  
Liv4 317 **catgcaatcaaacaaaaagcatcttgagacgctcctggttggaatcagtttaaatcaattt**  
G4-1 254 -----**tcaaacaaaaagcatcttgat****acgctcctggttggaatcagta****taaatcaattt**  
Skin 646 **catt****caatcaaacaaaaagcatcttgagacgctcctggttggaatcagta****taaatcaattt**

G7-2 -----  
Liv1 575 **aaatgtgtgggttaaaaaccgctgcttagatctcataacaaagaaatgtttttacagccc**  
Liv5 364 **aaatgtgtgggttaaaaaccgctgcttagatctcataaccaa****a****aaatgtttttacagccc**  
G1-4 -----  
G7-4 -----  
LHS 470 **aaatgtgtgggttaaaaaccgctgcttagatctcataaccaagaaatgtttttacagccc**  
Lar4 273 **aaatgtgtgggttaaaaaccgctgcttagatctcataaccaagaaatgtttttacagccc**  
Liv4 377 **aaatgtgtgggttaaaaaccgctgcttagatctcataaccaaga****cat****gtttttacagccc**  
G4-1 309 **aaatgtgtgggttaaaaacc****tgctgcttagatctcataaccaagaaatgtttttacagccc**  
Skin 706 **aaatgtgtgggttaaaaact****ca****ctgctta****a****atctcataaccaagaaatg****c****ttttacagccc**

G7-2 -----  
Liv1 635 **gggaaaagtgaacctccacaaagatctttcttta**-----  
Liv5 424 **gggaaaagtgaacctccacaaagatctttcttta**-----  
G1-4 -----  
G7-4 -----  
LHS 530 **gggaaaagtgaacctccacaaagatctttctttagagcta****atgtagtagcttaagatct**  
Lar4 333 **gggaaaagtgaacctccacaaagatctttcttta**-----  
Liv4 437 **gggaaaagtgaacctccacaaagatctttcttta**-----  
G4-1 369 **gggaaaagtgg****ac****ctccacaaagatctttctttg**-----  
Skin 766 **gggaaaagtgaacctccacaaagatctttctttagagcta****atgtagtagcttaagatct**  
CTCGATTACATCATCGAATTC 3'1

G7-2 -----  
Liv1 -----  
Liv5 -----  
G1-4 -----  
G7-4 -----  
LHS 590 **catcagtgttgatgagcaaagtcggttggaacaaactgtacctcttttaaaaactttttg**  
Lar4 -----  
Liv4 -----  
G4-1 -----  
Skin 826 **catcagtgttgatgagcaaagtcggttggaacaaactgtacctcttttaaaaacg****ttttg**

G7-2 -----  
Liv1 -----  
Liv5 -----  
G1-4 -----  
G7-4 -----  
LHS 650 **aagg****tcagaccggagctaaaactccc****a****at****ttatctccatctggttattgagaaatg****ttgt**  
Lar4 -----  
Liv4 -----  
G4-1 -----  
Skin 886 **aag****tcagaccggagctaaaactccc****-****at****ttatctccatctggttattgagaaatg****ttgt**

G7-2 -----  
Liv1 -----  
Liv5 -----  
G1-4 -----  
G7-4 -----  
LHS 710 **gatttgggtgatttggatgaattaaaagaacctctataaacaaaaaaaaa**  
Lar4 -----  
Liv4 -----  
G4-1 -----  
Skin 945 **gatttgggtgatttgggtgaattaaaagaacctctataaacaaaaaaaaa**
