# Supplementary material for: Helical Antifreeze Proteins Have Independently Evolved in Fishes on Four Occasions
Source: PubMed Central journal article supplement (PMC3855684; doi:10.1371/journal.pone.0081285), 2013-12-06

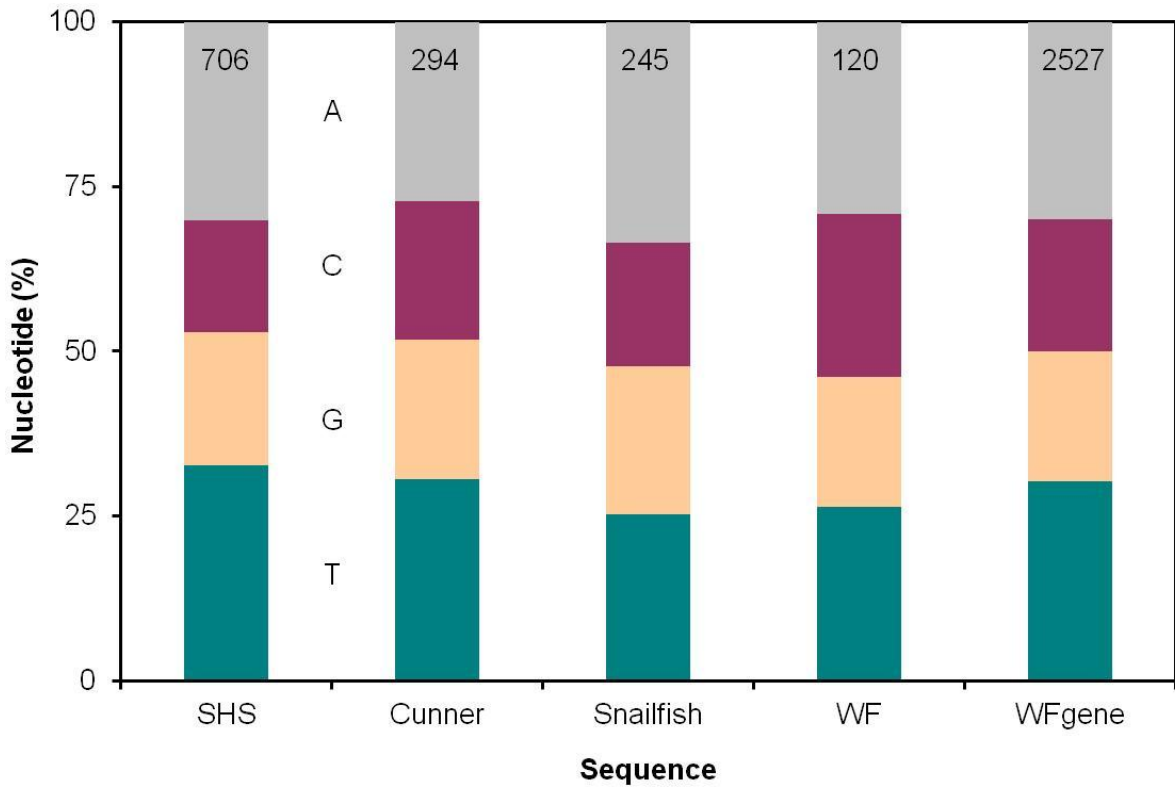

Supplement: pone.0081285.s003.pdf [file pone.0081285.s003.pdf]
