# Supplementary material for: Helical Antifreeze Proteins Have Independently Evolved in Fishes on Four Occasions
Source: PubMed Central journal article supplement (PMC3855684; doi:10.1371/journal.pone.0081285), 2013-12-06
Supplement: pone.0081285.s005.pdf [file pone.0081285.s005.pdf]

Winter flounder (*Pseudopleuronectes americanus*) 70

AF012462.1

AF012463.1

AF012464.1

AF012465.1

AF043384.1

AF102261.1

AF137182.1

AF156788.1

AF156789.1

AF156790.1

AF252633.1

AF301506.1

AF301511.1

AF301513.1

AF369067.1

AF512561.1

AF512562.1

AY053461.1

AY156726.1

AY174870.1

AY225096.1

AY225097.1

AY225098.1

AY225099.1

AY225101.1

AY225103.1

AY225104.1

AY521655.1

AY521656.1

AY521657.1

AY521658.1

AY521659.1

AY521660.1

AY521661.1

AY521662.1

AY521663.1

AY521664.1

AY521665.1

AY521666.1

AY521667.1  
AY521668.1  
AY521670.1  
AY521671.1  
AY521672.1  
AY631037.1  
AY631038.1  
AY631039.1  
AY794223.1  
AY836578.1  
EU684053.1  
EU684055.1  
FJ379291.1  
FJ870490.1  
GQ397970.1  
GU828013.1  
GU828014.1  
HQ406771.1  
HQ406772.1  
HQ406773.1  
HQ406774.1  
HQ623429.1  
HQ623430.1  
HQ659503.1  
L11615.1  
U03674.1  
U13963.1  
U45877.1  
X13594.1  
X74492.1  
Z97028.1

Longhorn sculpin (*Myoxocephalus octodecemspinosus*) 10

AF026525.1  
DQ520199.1  
EU391598.1  
EU391599.2  
EU391600.1  
EU444011.1  
EU440324.1

EU703783.1  
EU909191.1  
JN252127.1

Liparids 8  
AY362235.1  
AY539253.1  
AY539452.1  
AY547502.1  
AY547503.1  
AY547504.1  
DQ168081.1  
EU492247.1

Cunner (*Tautoglabrus adspersus*) 10  
AY279855.1  
AY279958.1  
AY496969.1  
GU596480.1  
GU596481.1  
GU596482.1  
HM050022.1  
HM050081.1  
HM050201.1  
HM050264.1

Winter flounder hyperactive AFP  
EU188795.1

Longhorn sculpin skin AFP  
AF306348.1

Shorthorn sculpin skin AFP  
AF305502.1

Atlantic snailfish AFP  
AY455862.1

Cunner AFP  
JF937681.2
